# Supplementary material for: Degradation of azo dye with activated peroxygens: when zero-valent iron meets chloride
Source: Royal Society of Chemistry journal article supplement (doi:10.1039/c7ra03872k), 2017-01-01
Supplement: c7ra03872k1.pdf [file c7ra03872k1.pdf]

## Support information

### Degradation of azo dye with activated peroxygens: when zero-valent iron meets chloride

Zhaohui Wang<sup>a,b\*</sup>, Luoyan Ai<sup>a</sup>, Ying Huang<sup>a</sup>, Juekai Zhang<sup>a,c</sup>, Sitong Li<sup>a,c</sup>, Jiawei

Chen<sup>a,c</sup>, Fei Yang<sup>a</sup>

<sup>a</sup> *State Environmental Protection Engineering Center for Pollution Treatment and Control in Textile Industry, College of Environmental Science and Engineering, Donghua University, Shanghai, 201620, China*

<sup>b</sup> *International Centre for Balanced Land Use (ICBLU), The University of Newcastle, Callaghan, NSW 2308, Australia*

<sup>c</sup> *Shanghai Shixi High School (SSHS), Jing'an District, Shanghai, 200040, China*

\*Corresponding author

*E-mail:*                    [zhaohuiwang@dhu.edu.cn](mailto:zhaohuiwang@dhu.edu.cn) (Z.                    Wang)

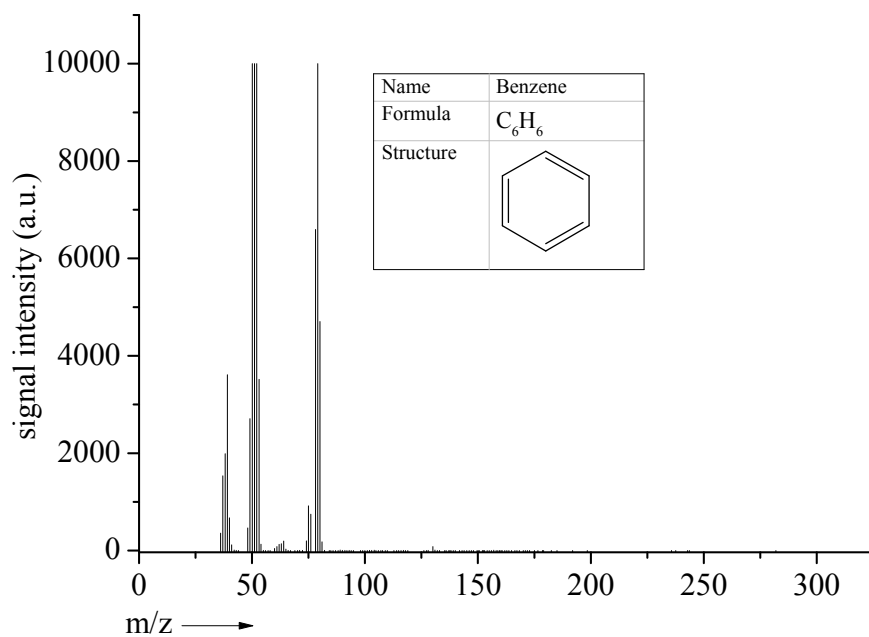

**Fig. S1** The GC-MS spectrum of Benzene

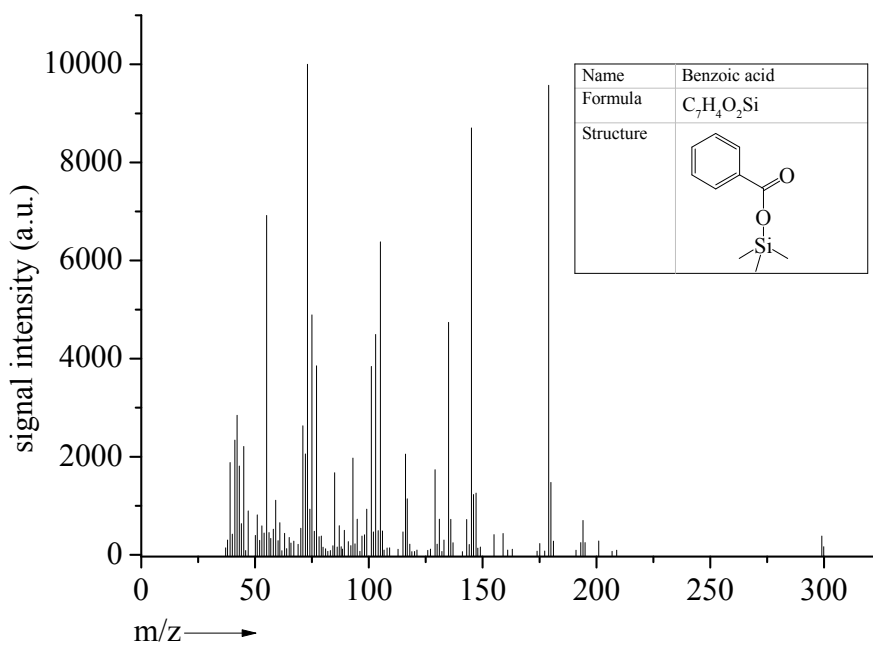

**Fig. S2** The GC-MS spectrum of Benzoic acid

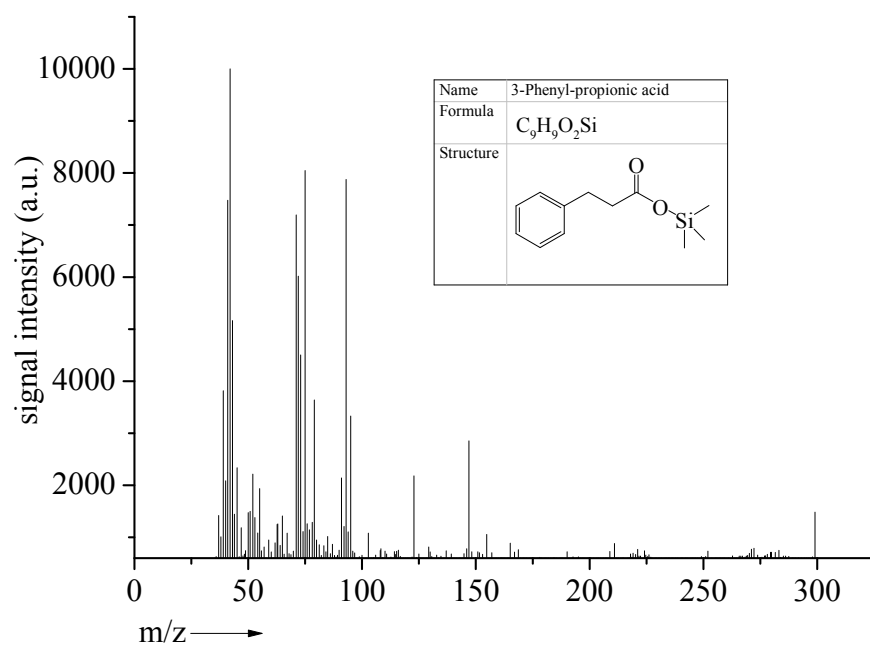

**Fig. S3** The GC-MS spectrum of 3-Phenyl-propionic acid

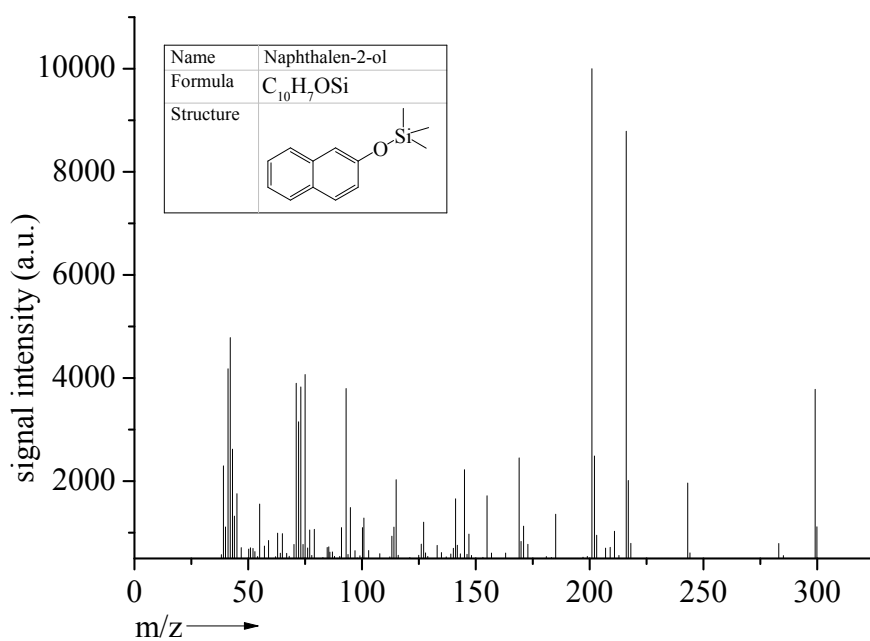

**Fig. S4** The GC-MS spectrum of Naphthalen-2-ol

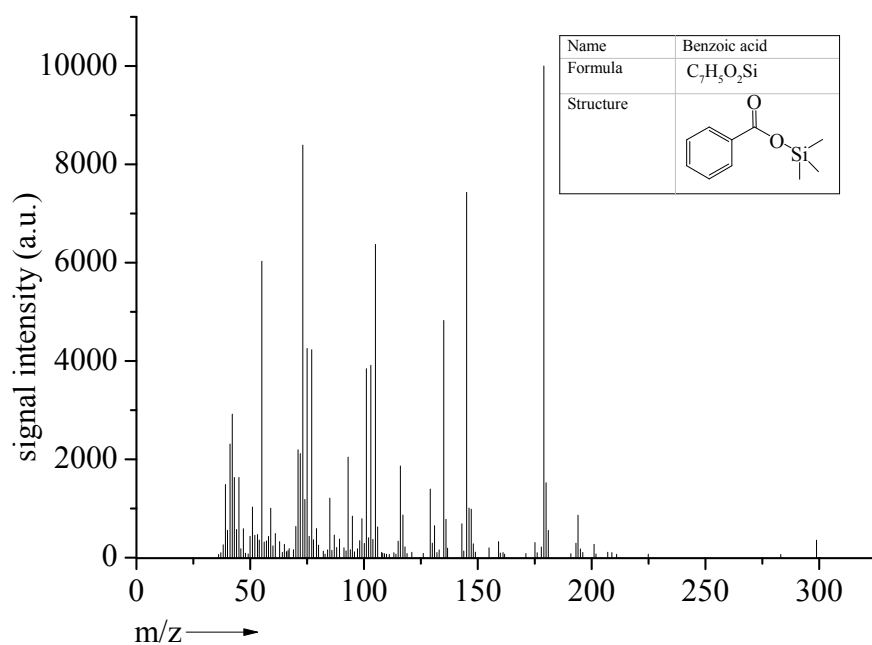

**Fig. S5** The GC-MS spectrum of Benzoic acid

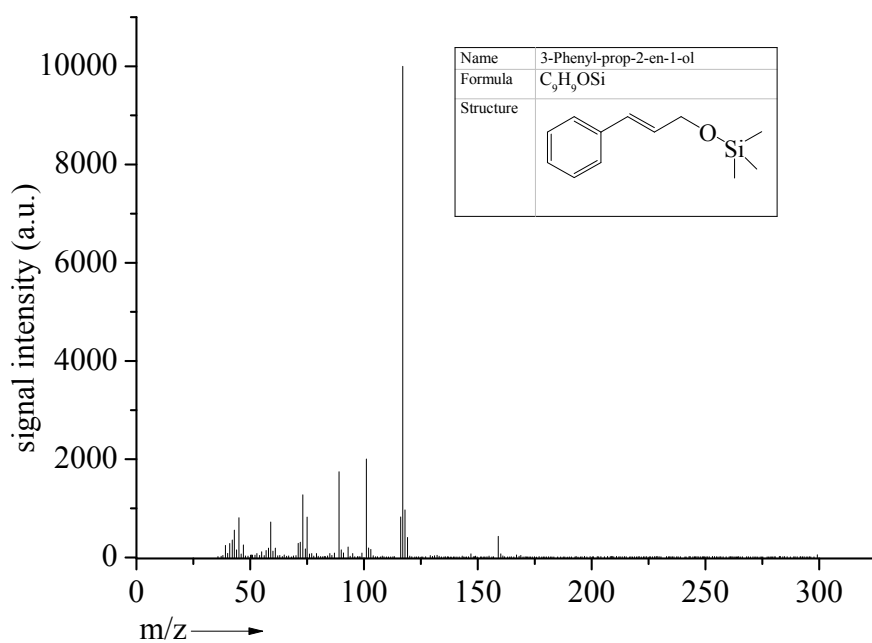

**Fig. S6** The GC-MS spectrum of 3-Phenyl-prop-2-en-1-ol

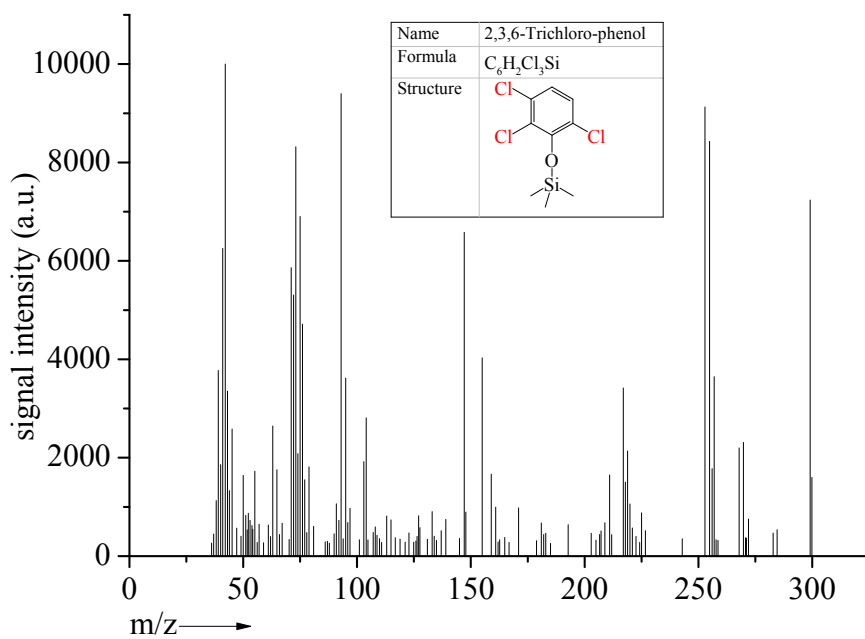

**Fig. S7** The GC-MS spectrum of 2,3,6-Trichloro-phenol

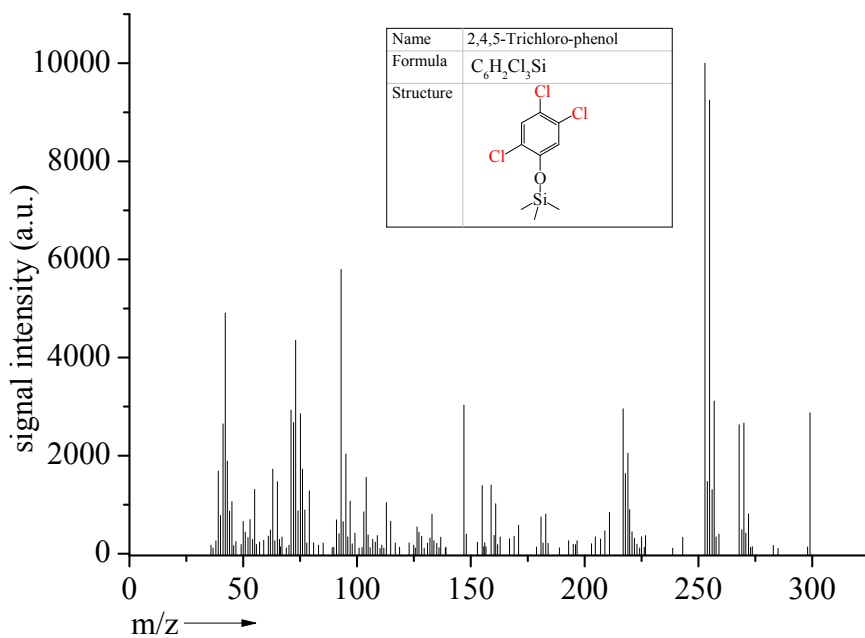

**Fig. S8** The GC-MS spectrum of 2,4,5-Trichloro-phenol

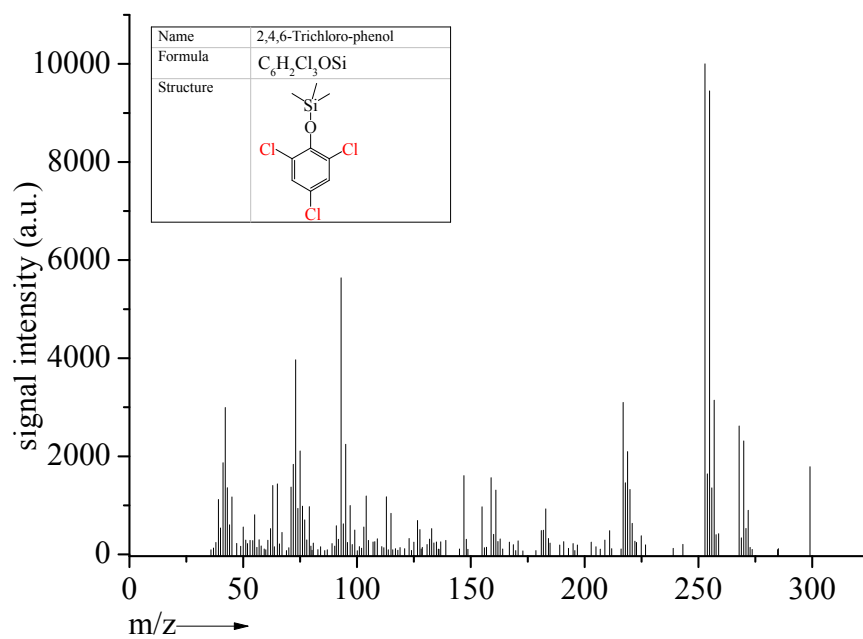

**Fig. S9** The GC-MS spectrum of 2,4,6-Trichloro-phenol

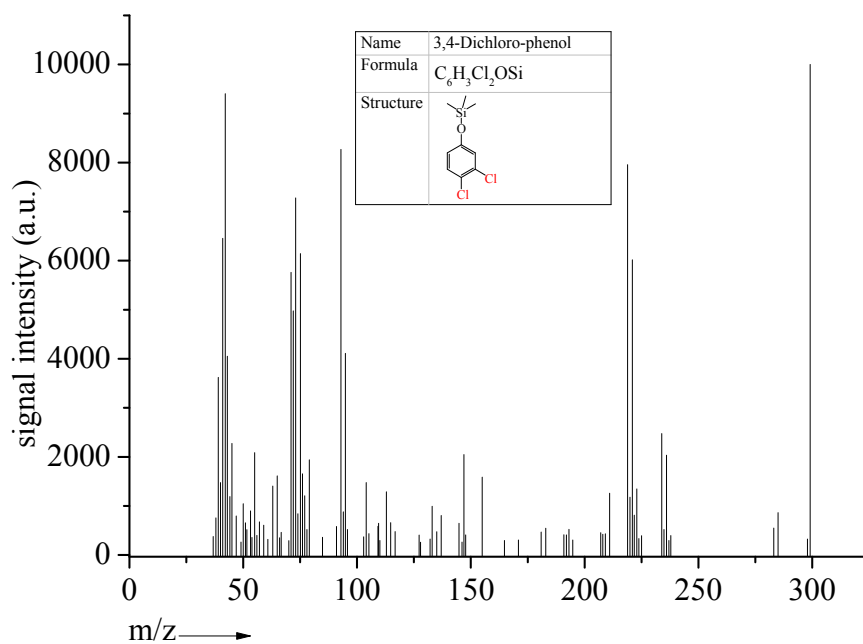

**Fig. S10** The GC-MS spectrum of 3,4-Dichloro-phenol

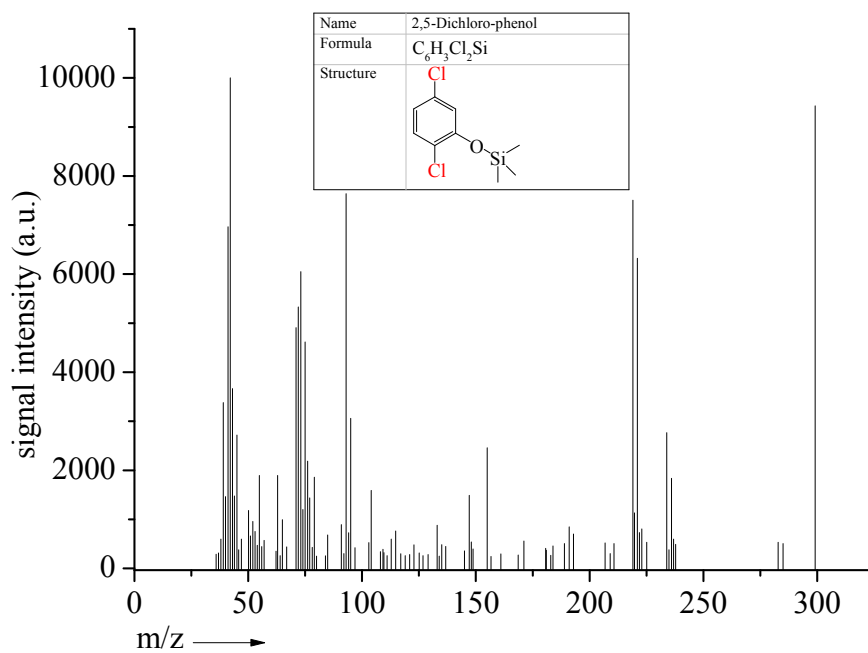

**Fig. S11** The GC-MS spectrum of 2,5-Dichloro-phenol

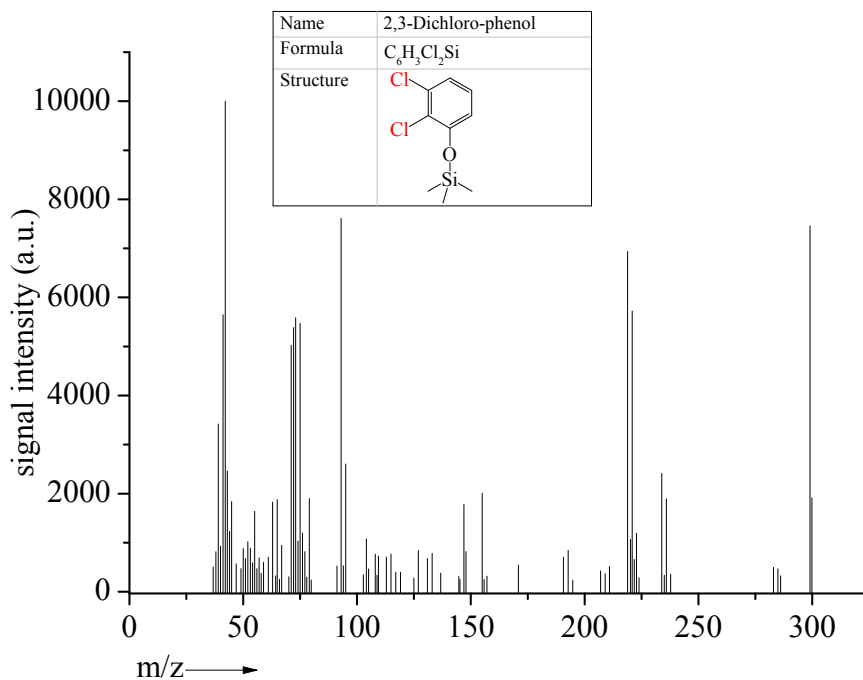

**Fig. S12** The GC-MS spectrum of 2,3-Dichloro-phenol

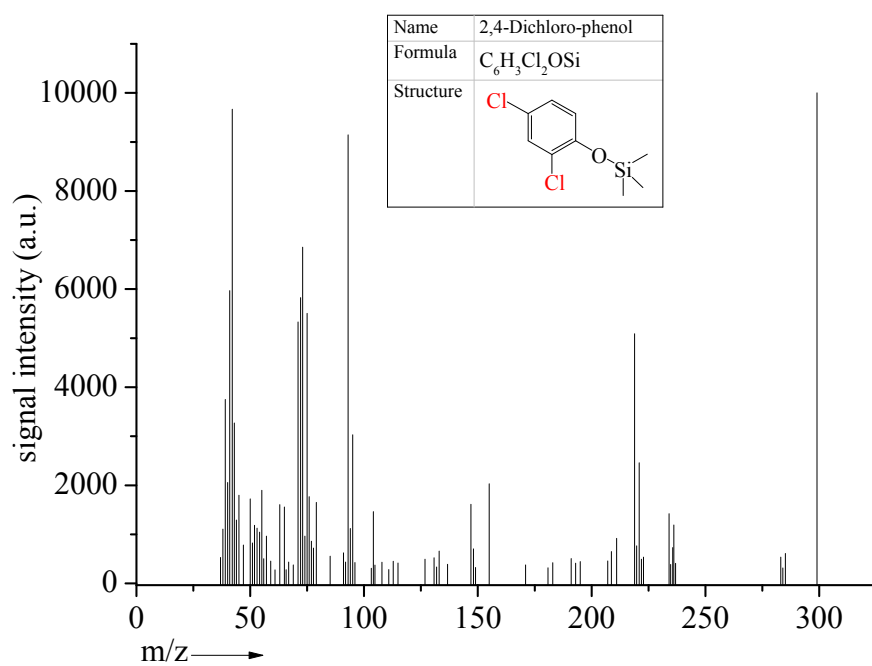

**Fig. S13** The GC-MS spectrum of 2,4-Dichloro-phenol

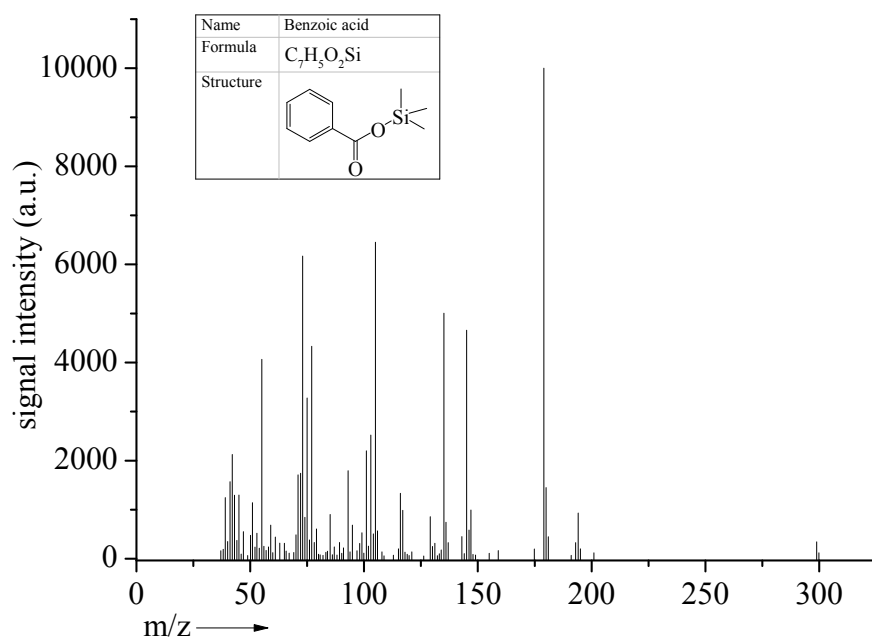

**Fig. S14** The GC-MS spectrum of Benzoic acid



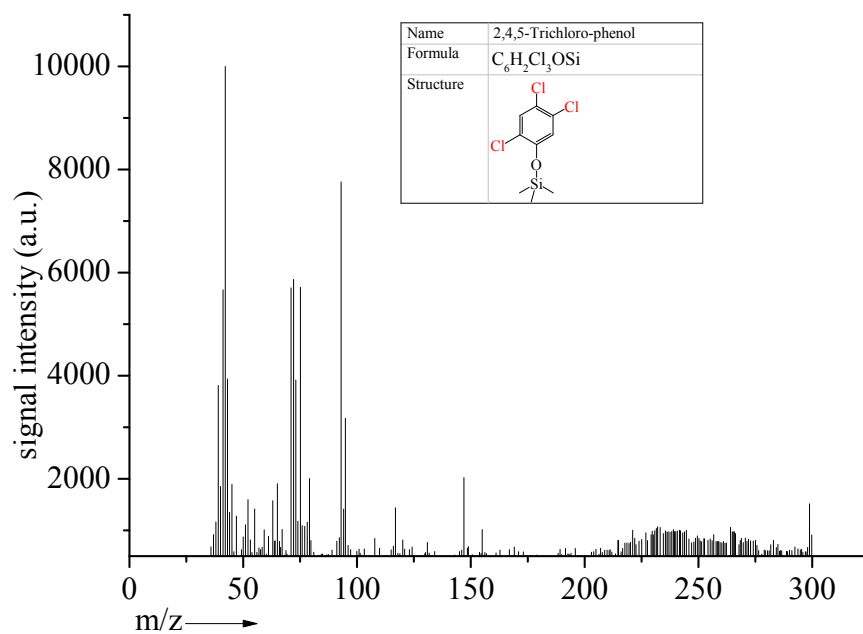

**Fig. S15** The GC-MS spectrum of 2,4,5-Trichloro-phenol

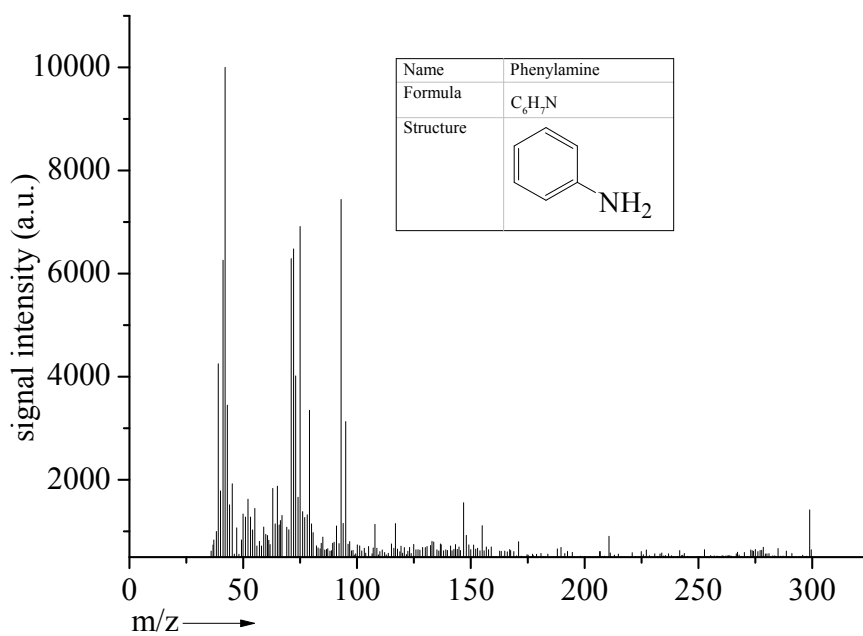

**Fig. S16** The GC-MS spectrum of Phenylamine

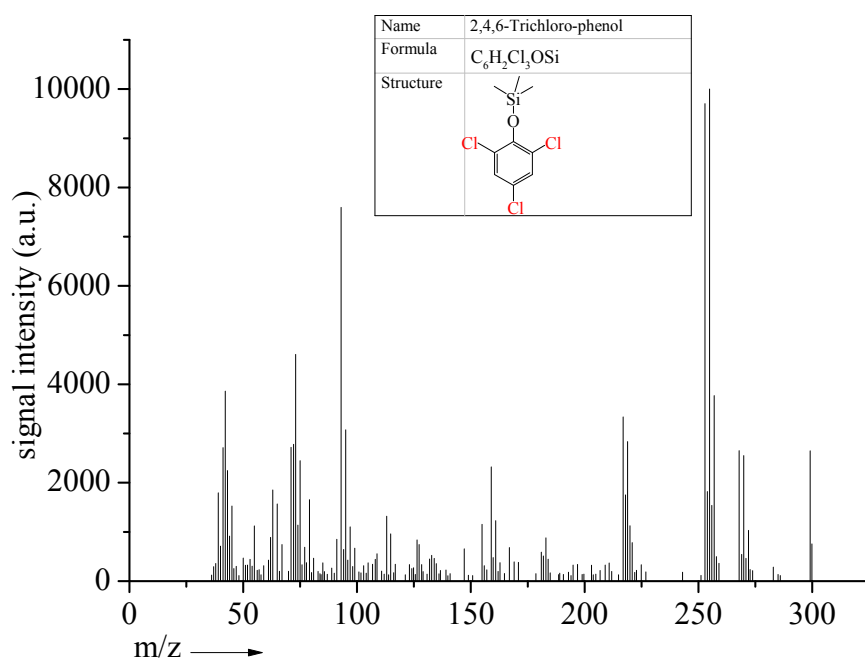

**Fig. S17** The GC-MS spectrum of 2,4,6-Trichloro-phenol

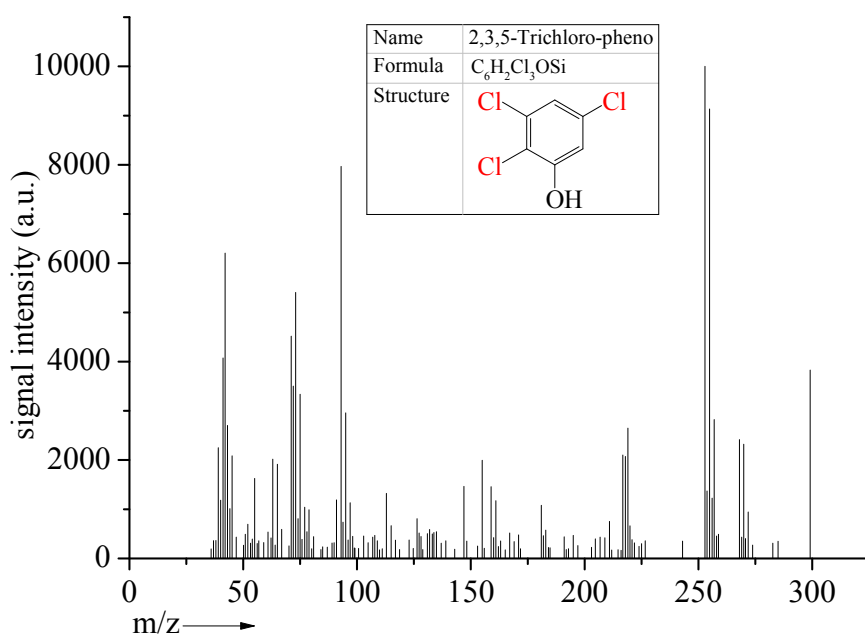

**Fig. S18** The GC-MS spectrum of 2,3,5-Trichloro-phenol
